# Supplementary material for: Visual Search in ASD: Instructed Versus Spontaneous Local and Global Processing
Source: Springer Nature journal article supplement (doi:10.1007/s10803-016-2826-1), 2016-06-22
Supplement: MOESM1 [file 10282238]

## Appendix 1

Table 4

*Experiment 1: Participant Characteristics on the Analysis on Order*

|  | ASD | | TD | |  |  | | ASD | | TD | |  |
| --- | --- | --- | --- | --- | --- | --- | --- | --- | --- | --- | --- | --- |
|  | (8*M* : 2*F*) | | (11*M* : 3*F*) | |  |  | | (10*M* : 1*F*) | | (17*M* : 2*F*) | |  |
| Global-then-Local | M | *SD* | M | *SD* | *p*-value | | Local-then-Global | M | *SD* | M | *SD* | *p*-value |
| Age (months) | 103 | 12 | 103 | 14 | .92 | | Age (months) | 101 | 14 | 99 | 14 | .65 |
| Verbal IQ | 96 | 11 | 104 | 11 | .13 | | Verbal IQ | 108 | 13 | 112 | 11 | .38 |
| Performance IQ | 103 | 10 | 104 | 11 | .86 | | Performance IQ | 105 | 17 | 105 | 13 | .99 |

Table 5

*Experiment 1: Participant Characteristics on the Analysis on Block Type*

|  | ASD | | TD | |  |  | | ASD | | TD | |  |
| --- | --- | --- | --- | --- | --- | --- | --- | --- | --- | --- | --- | --- |
|  | (7*M* : 2*F*) | | (19*M* : 3*F*) | |  |  | | (11*M* : 1*F*) | | (10*M* : 1*F*) | |  |
| Shape | M | *SD* | M | *SD* | *p*-value | | Snake | M | *SD* | M | *SD* | *p*-value |
| Age (months) | 102 | 14 | 100 | 14 | .71 | | Age (months) | 103 | 13 | 104 | 13 | .88 |
| Verbal IQ | 101 | 13 | 107 | 11 | .24 | | Verbal IQ | 103 | 14 | 113 | 14 | .11 |
| Performance IQ | 107 | 16 | 105 | 13 | .67 | | Performance IQ | 102 | 13 | 106 | 13 | .55 |

## Appendix 2

A repeated-measures mixed model analysis with accuracy as dependent variable, *Group* as between-subject variable, and *Instruction*, *Target Type*, *Noise* and *Complexity* as within-subject variables, revealed a main effect of *Instruction* (*F*(1, 51) = 18.87, *p <* .0001), *Target Type* (*F*(2, 102) = 45.33, *p <* .0001), *Noise* (*F*(1, 51) = 369.12, *p <* .0001) and *Complexity* (*F*(1, 51) = 735.50, *p <* .0001), as well as a two-way interaction effect of *Group* x *Instruction* (*F*(1, 51) = 6.02, *p =* .0176) and *Target Type* x *Instruction* (*F*(2, 103) = 19.37, *p <* .0001), *Instruction* x *Noise* (*F*(1, 52) = 6.46, *p =* .0141), *Target Type* x *Noise* (*F*(2, 104) = 21.57, *p <* .0001), *Noise* x *Complexity* (*F*(1, 52) = 140.58, *p <* .0001). There was no significant main effect of *Group* (*F*(1, 51) = 2.44, *p =* .1247), and no significant two-way interaction effect between *Group* x *Target Type* (*F*(2, 102) = 1.91, *p =* .1533), *Group* x *Noise* (*F*(1, 51) = .13, *p =* .7174) , *Group* x *Complexity* (*F*(1, 51) = 0.09, *p =* .7643), *Instruction* x *Complexity* (*F*(1, 52) = .35, *p =* .5570), *Target Level* x *Complexity* (*F*(2, 104) = 1.09, *p =* .3386). The *Instruction* x *Noise* (*F*(1, 52) = 6.46, *p =* .0141) interaction effect indicated that, while both in the explicit and implicit condition, participants were more accurate in absence of noise, than when noise was present, the difference between noise-absent and noise-present trials was slightly larger in the explicit task conditions, than in the implicit task conditions. The *Target Type* x *Noise* (*F*(2, 104) = 21.57, *p <* .0001) interaction effect revealed that, while participants were consistently more accurate in absence of noise, the performance difference between noise-absent and noise-present trials, was stronger for trials with global (open or closed) targets, than for trials with local targets. The *Noise* x *Complexity* (*F*(1, 52) = 140.58, *p <* .0001) interaction effect revealed that, while participants were sensitive to both manipulations of noise and complexity, their performance was more hindered by the noise manipulation, than hindered by the complexity manipulation. Participants scores best in absence of both noise and complexity, and performed the worst when stimuli included noise and target complexity.

A similar repeated-measures mixed model analysis with logRT as dependent variable revealed similar effects: a main effect of *Instruction* (*F*(1, 51) = 92.64, *p <* .0001), *Target Type* (*F*(2, 102) = 364.56, *p <* .0001), *Noise* (*F*(1, 51) = 359.99, *p <* .0001) and *Complexity* (*F*(1, 51) = 1192.78, *p <* .0001), as well as two-way interaction effects of *Group* x *Instruction* (*F*(1, 51) = 11.66, *p =* .0013) and *Target Type* x *Instruction* (*F*(2, 103) = 8.89, *p =* .0003), *Instruction* x *Noise* (*F*(1, 52) = 23.98, *p <* .0001), *Target Type* x *Noise* (*F*(2, 104) = 91.82, *p <* .0001), *Target Level* x *Complexity* (*F*(2, 104) = 11.86, *p <* .0001), *Noise* x *Complexity* (*F*(1, 52) = 24.83, *p <* .0001). There was no significant main effect of *Group* (*F*(1, 51) = 2.66, *p =* .1090), and no significant two-way interaction effect between *Group* x *Target Type* (*F*(2, 102) = .64, *p =* .5305), *Group* x *Noise* (*F*(1, 51) = 1.41, *p =* .2411), *Group* x *Complexity* (*F*(1, 51) = 4.87, *p =* .0319), *Instruction* x *Complexity* (*F*(1, 52) = 3.97, *p =* .0516). The *Instruction* x *Noise* (*F*(1, 52) = 23.98, *p <* .0001) interaction effect indicated that, while both in the explicit and implicit condition, participants responded faster in absence of noise, than when noise was present, the difference between noise-absent and noise-present trials was slightly larger in the explicit task conditions, than in the implicit task conditions. The *Target Type* x *Noise* (*F*(2, 104) = 91.82, *p <* .0001) interaction effect revealed that, while participants were consistently fastest in absence of noise, the performance difference between noise-absent and noise-present trials, was stronger for trials with global (open or closed) targets, than for trials with local targets. The *Target Level* x *Complexity* (*F*(2, 104) = 11.86, *p <* .0001) interaction effect revealed that, while participants were consistently faster for the easier trials compared to the trials with more complex targets, the precise difference in performance differed depending on the particular type of target. The *Noise* x *Complexity* (*F*(1, 52) = 140.58, *p <* .0001) interaction effect revealed that, while participants were sensitive to both manipulations of noise and complexity, their performance was more hindered by the noise manipulation, than hindered by the complexity manipulation. Participants were fastest in absence of both noise and complexity, while the largest reaction times were linked to trials where noise was present and target complexity was increased.

## Appendix 3

To evaluate possible differential effects of learning in the explicit condition, two additional analyses were performed. In these analyses data from the first 20 trials per *Target Type* were compared to data from the last 20 trials per *Target Type* (under the explicit task instruction).

A mixed-model analysis with accuracy as dependent variable, *Group* as between-subject variable, and *Target Type* and *Test Block* as within-subject variables, revealed a main effect of *Test Block*, *F*(1, 51) = 6.00, *p* = .02 and *Target Type*, *F*(2, 102) = 19.42, *p* < .0001. However, none of the following effects was significant: *Group*, *F*(1, 51) = .32, *p* = .57, *Group* x *Test Block*, *F*(1, 51) = .18, *p* = .68, *Group* x *Target Type* *F*(2, 102) = 2.12, *p* = .13, *Test Block* x *Target Type F*(2, 102) = 1.56, *p* = .22, and *Group* x *Target Type* x *Test Block* *F*(2, 102) = .44, *p* = .65. Both groups became slightly more accurate as the task evolved (*ME* = .90, *SDE* =.07 vs *MI* = .92, *SDI* =.08) but we found no *Group* x *Test Block* interaction effect.

A mixed-model analysis with RT as dependent variable, *Group* as between-subject variable, and *Target Type* and *Test Block* as within-subject variables, revealed a main effect of *Test Block*, *F*(1, 51) = 23.70, *p* < .0001 and *Target Type*, *F*(2, 102) = 105.63, *p* < .0001. However, none of the following effects was significant: *Group*, *F*(1, 51) = .80, *p* = .38, *Group* x *Test Block,* *F*(1, 51) = 1.04, *p* = .31, *Group* x *Target Type* *F*(2, 102) = .55 *p* = .58, *Test Block* x *Target Type F*(2, 102) = .15, *p* = .86, and *Group* x *Target Type* x *Test Block F*(2, 102) = 1.36, *p* = .26. Both groups became faster as the task evolved (*ME* = 1317, *SDE =* 332 vs *MI* = 1205, *SDI* = 293) but again, we found no *Group* x *Test Block* interaction effect.

These additional analyses indicated that while both groups learned in the explicit condition, both in terms of accuracy and reaction time performance, both groups improved their performance in a similar manner.
